# Supplementary material
Source: PubMed Central journal article supplement (PMC4193919)
Supplement: embj0033-1117-sd3.pdf [file embj0033-1117-sd3.pdf]

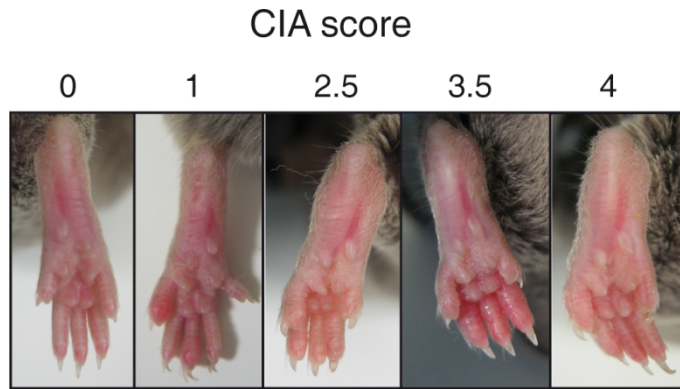

**Supplementary Figure S3** Collagen-induced arthritis scores. Images of inflamed paws at different arthritic scores.
