# Supplementary material
Source: PubMed Central journal article supplement (PMC4193919)
Supplement: embj0033-1117-sd5.pdf [file embj0033-1117-sd5.pdf]

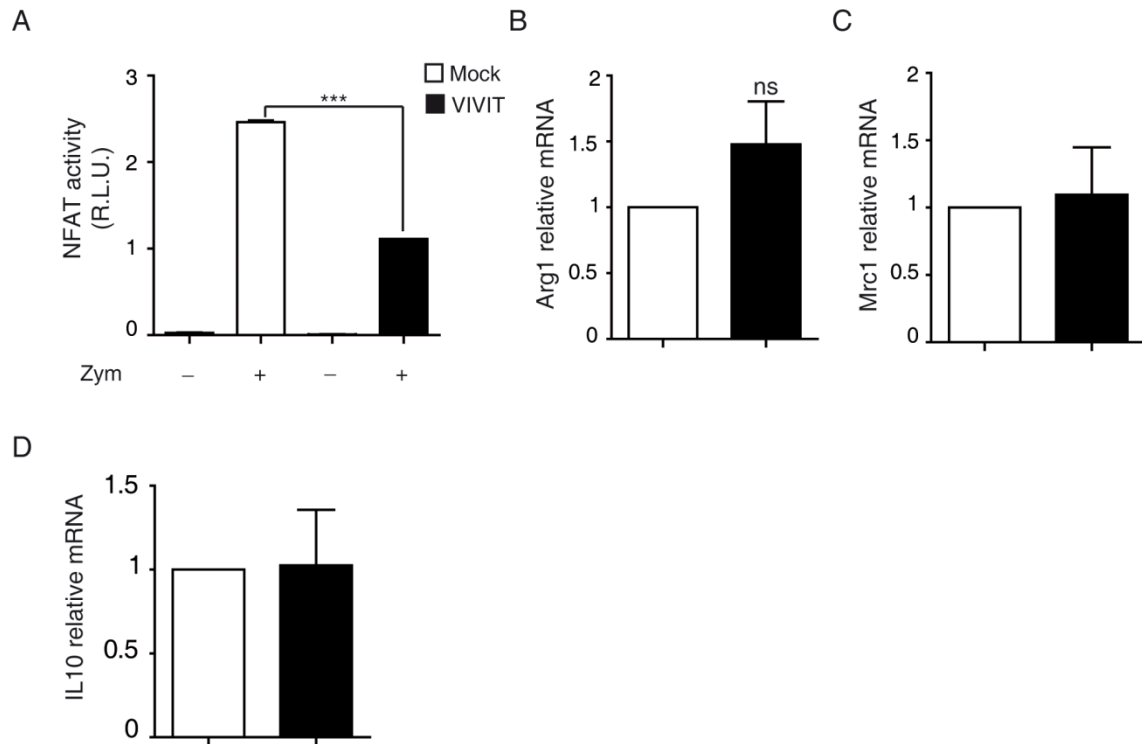

**Supplementary Figure S5. CN inhibition by the VIVIT peptide does not induce an anti-inflammatory phenotype in macrophages.** (A) VIVIT inhibits NFAT activity in macrophages from NFAT luc reporter mice. (B-D) Arg1, Mrc1 and IL10 mRNA expression in mock and VIVIT transduced macrophages. (mean  $\pm$  s.e.m.; n=3) \*\*\* $P$ < 0.001
