# Supplementary material
Source: PubMed Central journal article supplement (PMC4193919)
Supplement: embj0033-1117-sd6.pdf [file embj0033-1117-sd6.pdf]

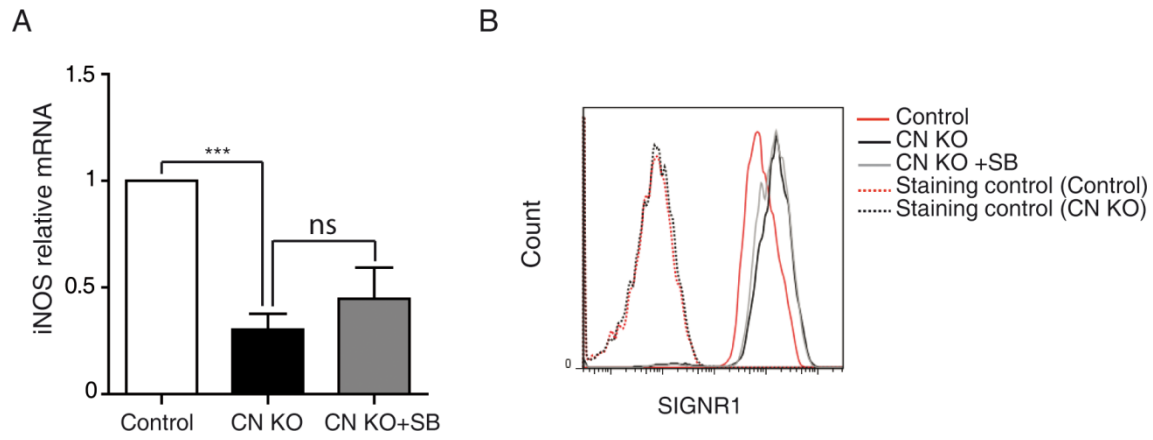

**Supplementary Figure S6. Effect of p38 inhibition in the phenotype of CN KO macrophages. (A,B)** Effect of p38 inhibition by SB203580 (SB) in iNOS mRNA (A) and SIGNR1 protein expression (B).\*\*\* $P < 0.001$
