# Supplementary material
Source: PubMed Central journal article supplement (PMC4193919)
Supplement: embj0033-1117-sd8.pdf [file embj0033-1117-sd8.pdf]

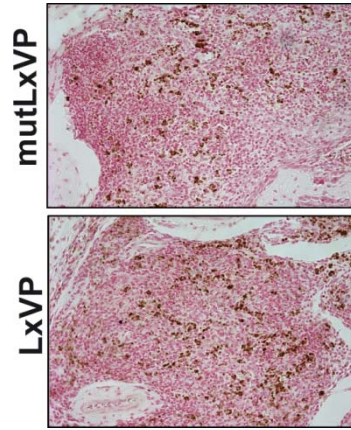

**Supplementary Figure S8. Transduced macrophages migrate to inflamed paws.** GFP immunostaining (brown) in paw sections from animals inoculated i.p. with LxVP or mutLxVP lentivirus.
