# Supplementary material
Source: PubMed Central journal article supplement (PMC4193919)
Supplement: embj0033-1117-sd9.pdf [file embj0033-1117-sd9.pdf]

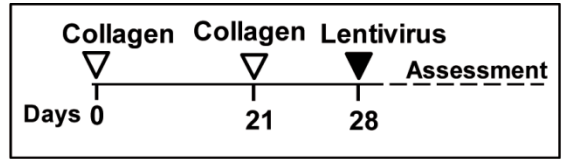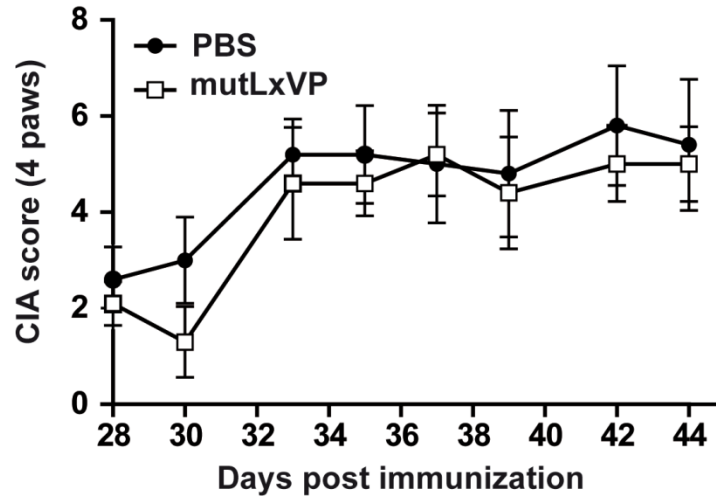

**Supplementary Figure S9.** Systemic lentiviral treatment does not exacerbate arthritic symptoms. CIA score in mice inoculated i.p. with vehicle (PBS) or control lentivirus (mutLxVP).  $n=10$  mice per group. (mean  $\pm$  s.e.m.)
