# Supplementary material
Source: PubMed Central journal article supplement (PMC4193919)
Supplement: embj0033-1117-sd12.pdf [file embj0033-1117-sd12.pdf]

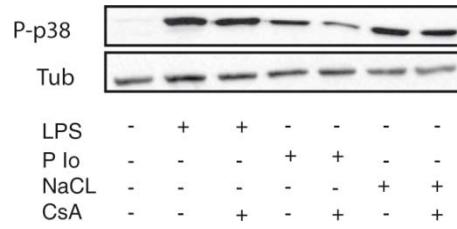

**Supplementary Figure S12. CsA inhibitory effect of p38 activation depends on the activating stimuli.** Effect of CsA treatment in P-p38 expression of macrophages stimulated by LPS, PMA+ calcium Ionophore (Plo) or 0,7 M NaCl.
