# Supplementary material
Source: PubMed Central journal article supplement (PMC4193919)
Supplement: embj0033-1117-sd13.pdf [file embj0033-1117-sd13.pdf]

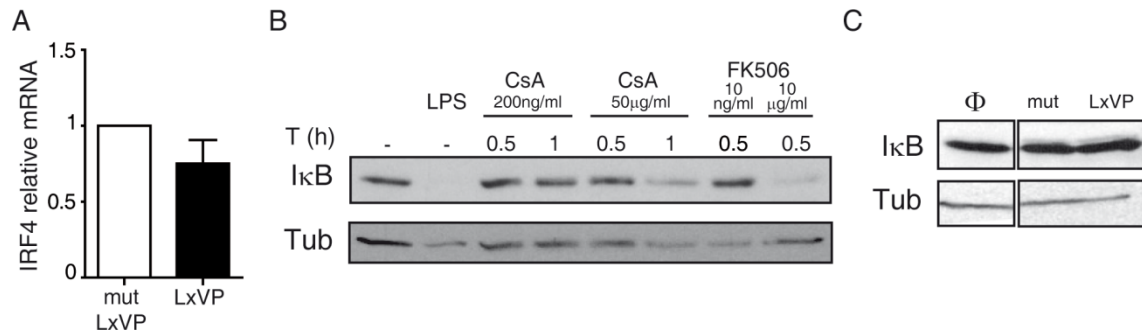

**Supplementary Figure S13. CN inhibition by IS or LxVP has no effects in IRF4 or NFκB.** (A) IRF4 mRNA levels in mutLxVP or LxVP transduced macrophages. (B) IκB expression in macrophages treated with low and high doses of CsA or FK506 at different times. (C). IκB expression in mutLxVP and LxVP transduced macrophages.
