# Supplementary material
Source: PubMed Central journal article supplement (PMC4193919)

GA200<sub>25</sub> GA500<sub>25</sub> PR500<sub>25</sub> PR500<sub>100</sub>  
 20 1h 45h 20 1h 45h 20 1h 45h 20 1h 45h

P-p38

—

20 1h 45h 20 1h 45h 20 1h 45h 20 1h 45h  
 α CIA CoA Fw 20g Fw 10g  
 200mg/ml 500mg/ml

Tub

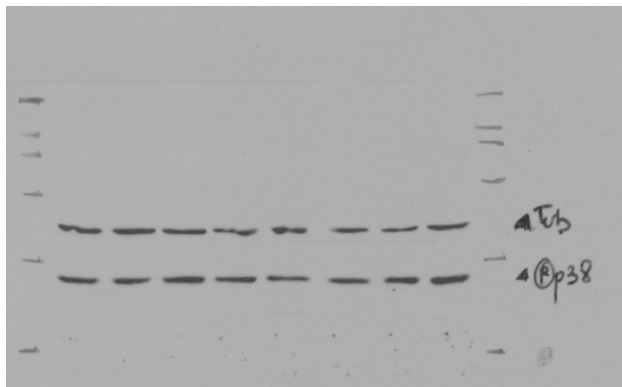

Supplement: embj0033-1117-sd16.pdf [file embj0033-1117-sd16.pdf]

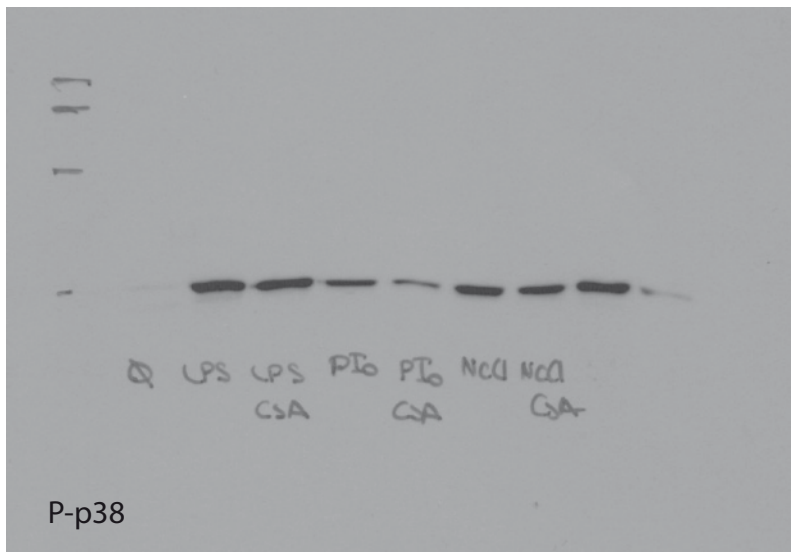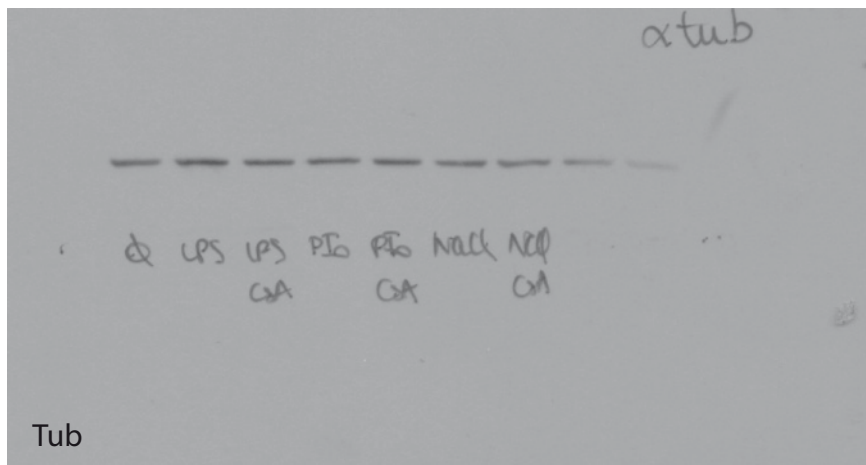

Supplement: embj0033-1117-sd17.pdf [file embj0033-1117-sd17.pdf]

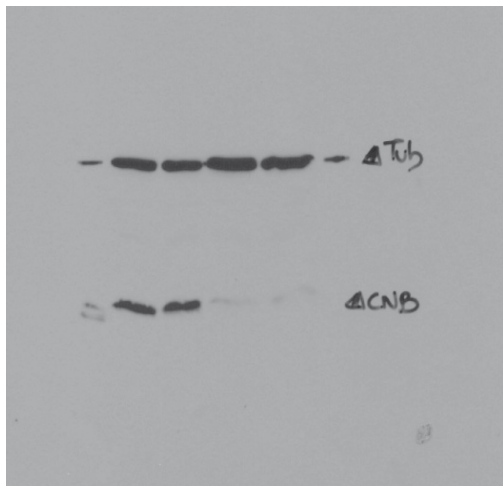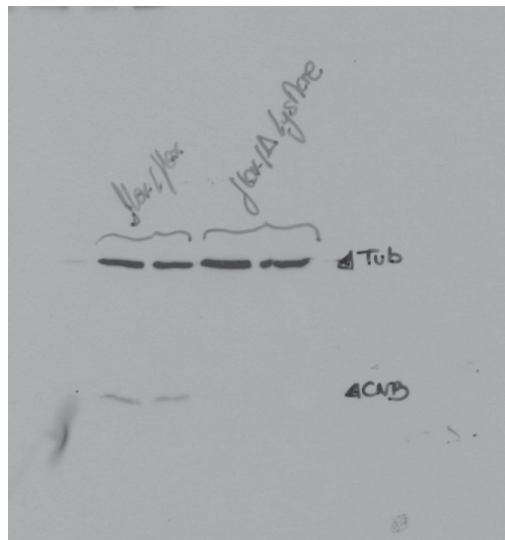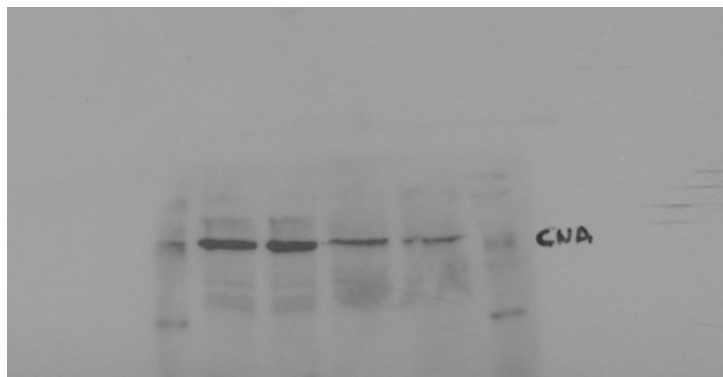

Supplement: embj0033-1117-sd20.pdf [file embj0033-1117-sd20.pdf]

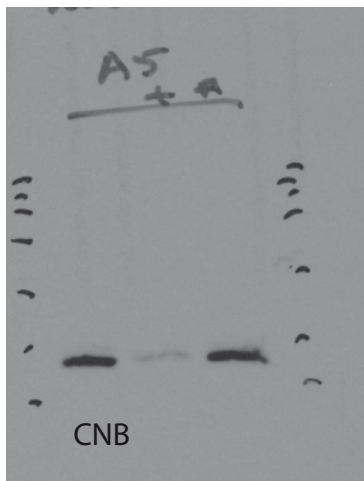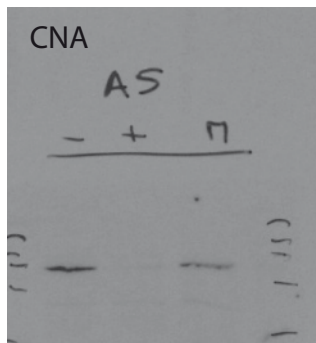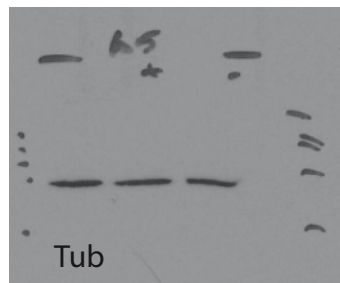

Supplement: embj0033-1117-sd21.pdf [file embj0033-1117-sd21.pdf]

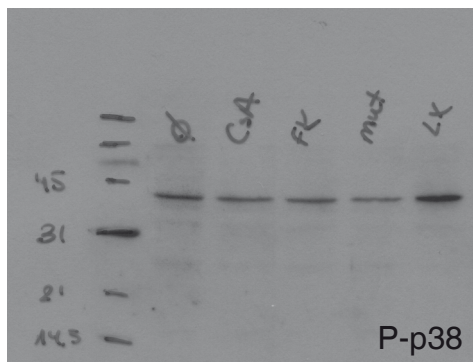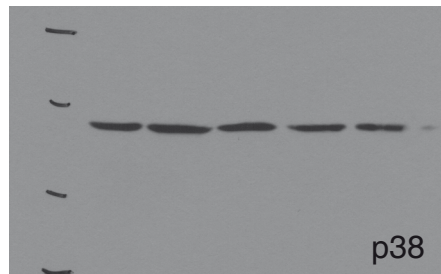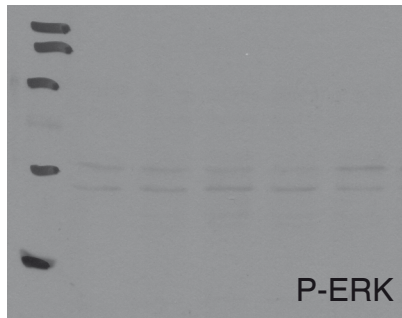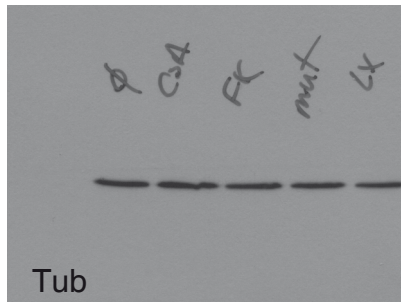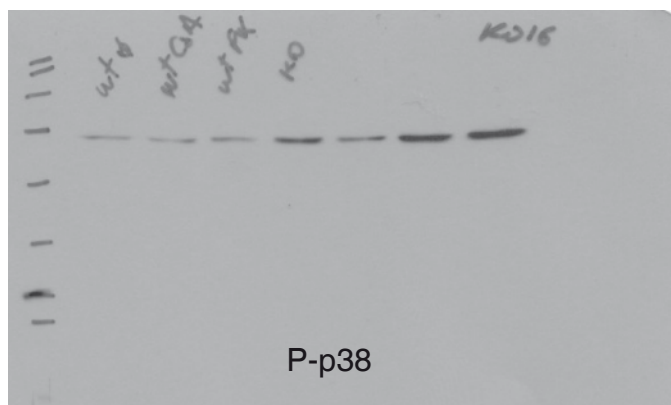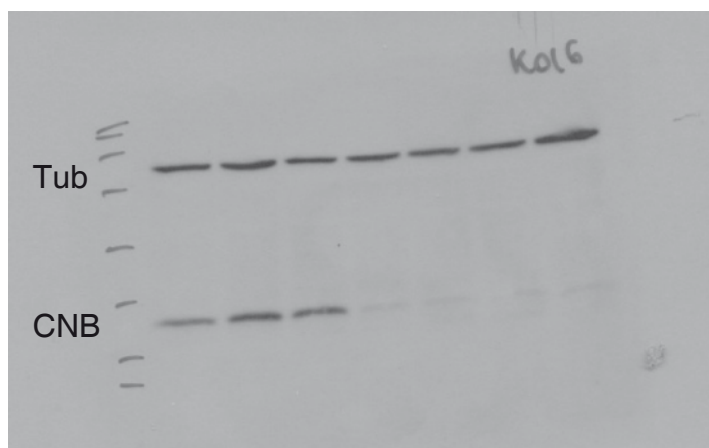

Supplement: embj0033-1117-sd22.pdf [file embj0033-1117-sd22.pdf]

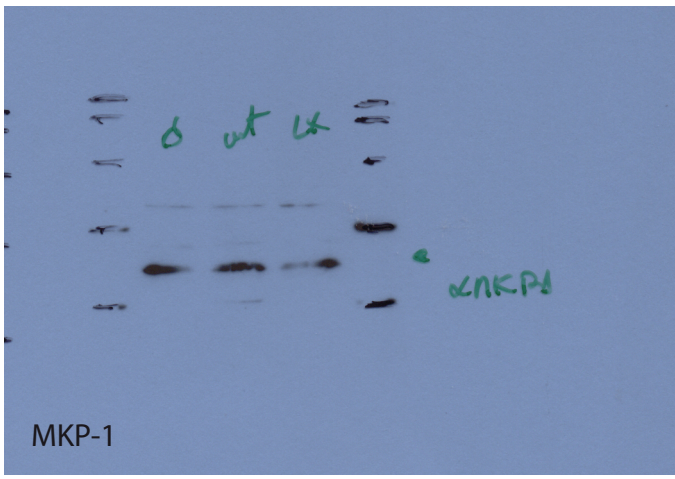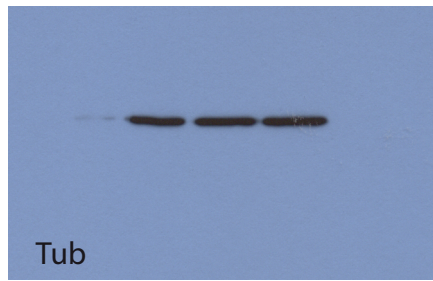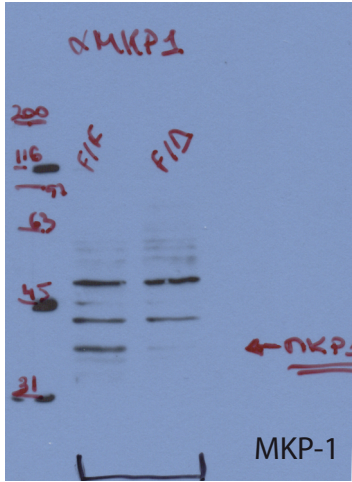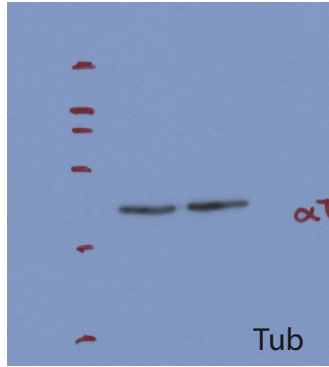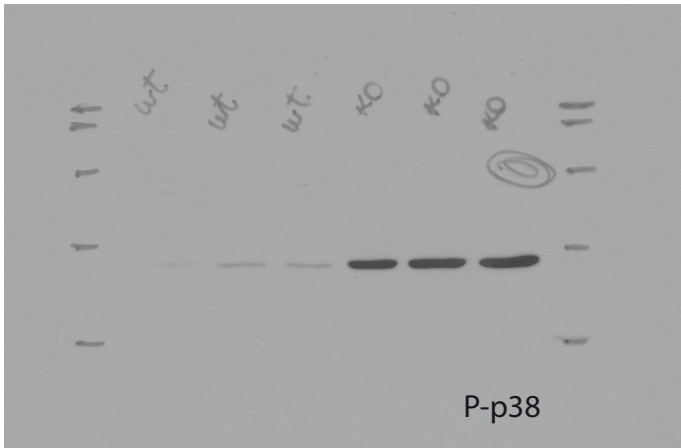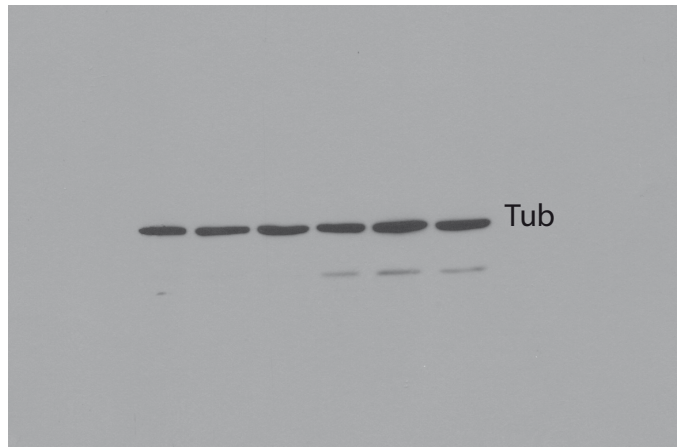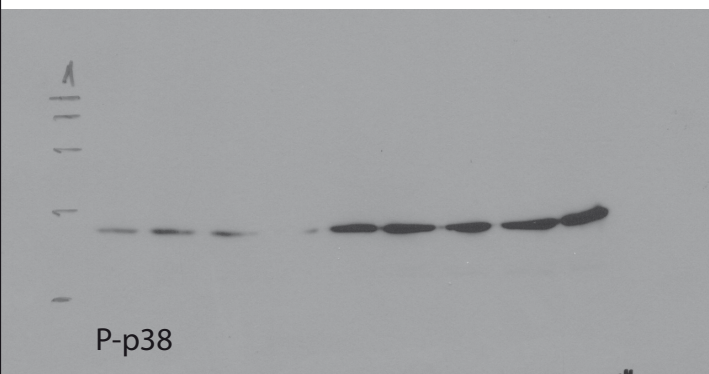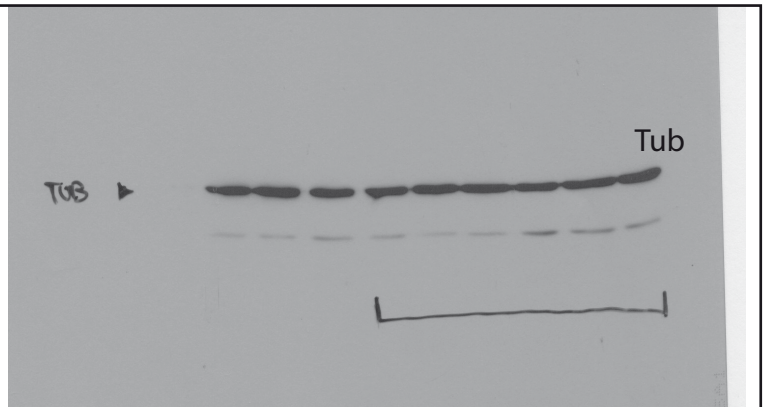

Supplement: embj0033-1117-sd23.pdf [file embj0033-1117-sd23.pdf]
